# Supplementary material for: Biomimetic polypyrrole/hyaluronic acid electrodes integrated with hyaluronidase inhibitors offer persistent electroactivity and resistance to cell binding
Source: Royal Society of Chemistry journal article supplement (doi:10.1039/d1tb02849a), 2022-01-01
Supplement: d1tb02849a1.pdf [file d1tb02849a1.pdf]

## Supporting information

Biomimetic polypyrrole/hyaluronic acid  
electrodes integrated with hyaluronidase  
inhibitors offer persistent electroactivity and  
resistance to cell binding

Jongdarm Yi<sup>a</sup>, Sanghun Lee<sup>a</sup>, and Jae Young Lee<sup>a\*</sup>

<sup>a</sup> School of Materials Science and Engineering, Gwangju Institute of Science and  
Technology, Gwangju 61005, Republic of Korea

[\\*jaeyounglee@gist.ac.kr](mailto:jaeyounglee@gist.ac.kr) (J.Y.L.)

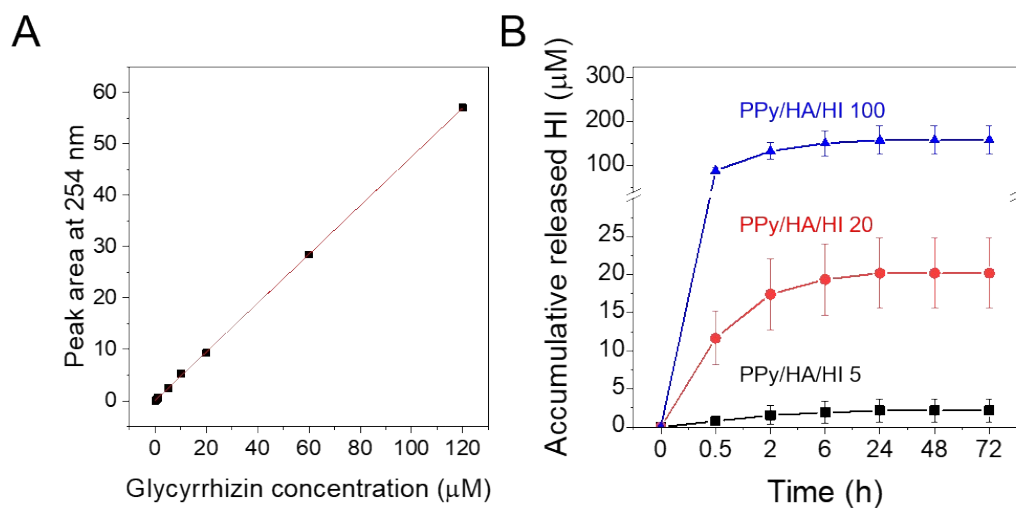

**Figure S1.** (A) Standard curve of glycyrrhizin with the peak area of absorbance at 254 nm, measured using high-performance liquid chromatography (HPLC). (B) Accumulative amounts of hyaluronidase inhibitor (HI) released from various PPy/HA/HI electrodes.

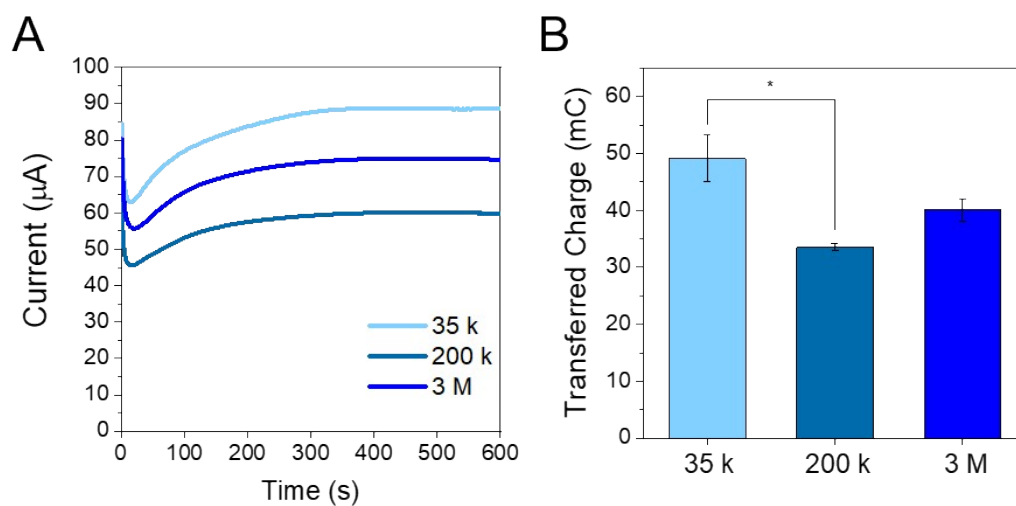

**Figure S2.** Electrochemical polymerization of PPy/HA on gold electrodes using hyaluronic acid (HA) of different molecular weights (MWs). (A) Current-time plots during the electrochemical polymerization of PPy/HA at a constant voltage (0.8 V versus SCE). (B) Transferred charges during the electrochemical polymerization.

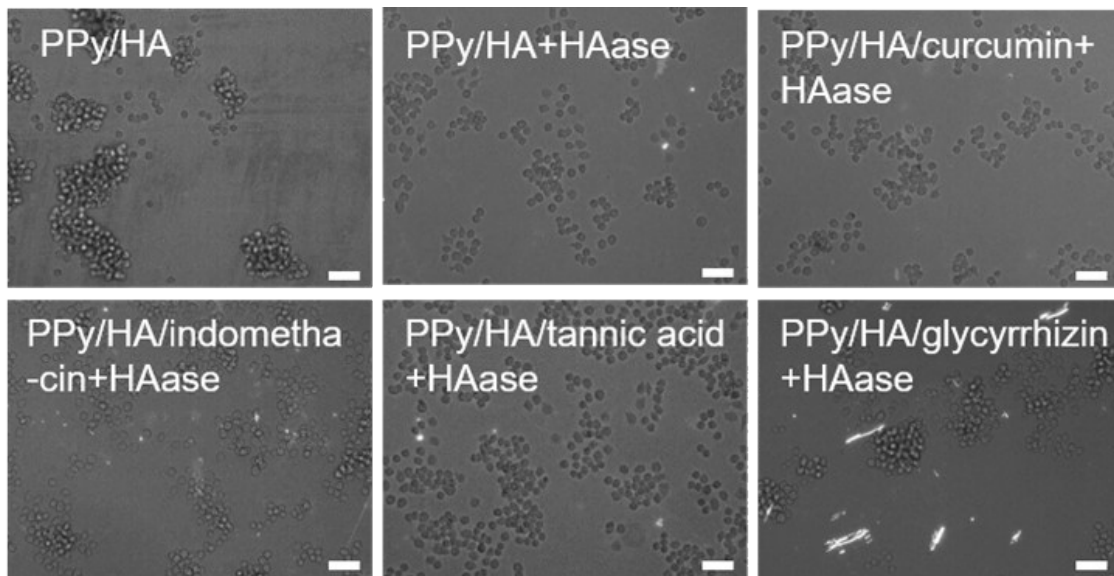

**Figure S3.** Screening of hyaluronidase inhibitor (HI) candidates using a cell adhesion test on PPy/HA electrodes with RAW 264.7 cells. Optical images of RAW 264.7 cells treated with hyaluronidase (HAase) (4 U/mL) on PPy/HA/HI electrodes with various inhibitor candidates, namely curcumin (Cur), indomethacin (In), tannic acid (TA), and glycyrrhizin (GL).

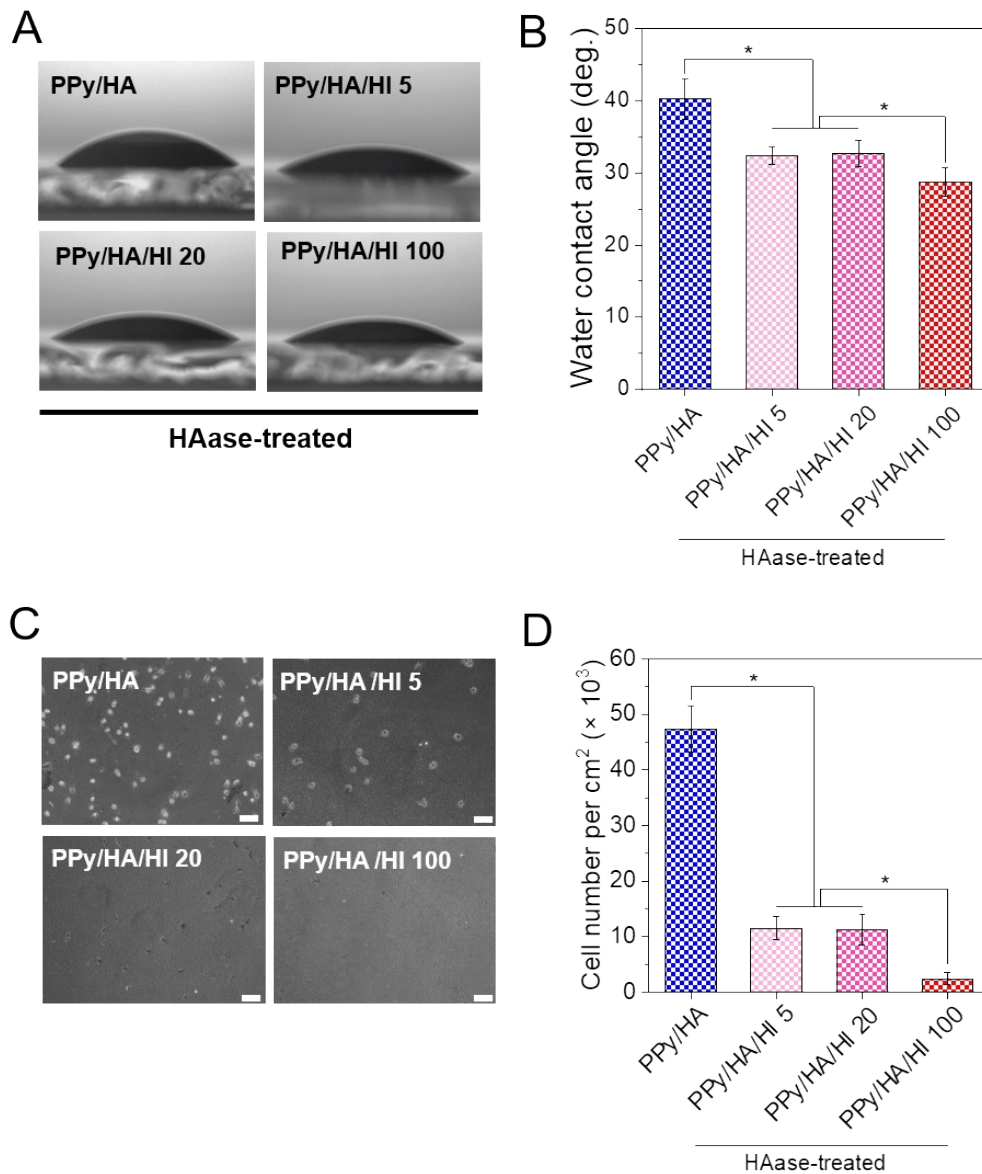

**Figure S4.** Characterization of PPy/HA/Hi electrodes incorporated with various concentrations of hyaluronidase inhibitor (HI). (A) Photographs and (B) water contact angles (WCAs) of PPy/HA/Hi after hyaluronidase (HAase) treatment. (C) Optical micrographs of the samples seeded with NIH-3T3 cells and cultured for 24 h. Scale bar = 100  $\mu$ m. (D) Cell number per image of each electrode, 24 h after cell culture.

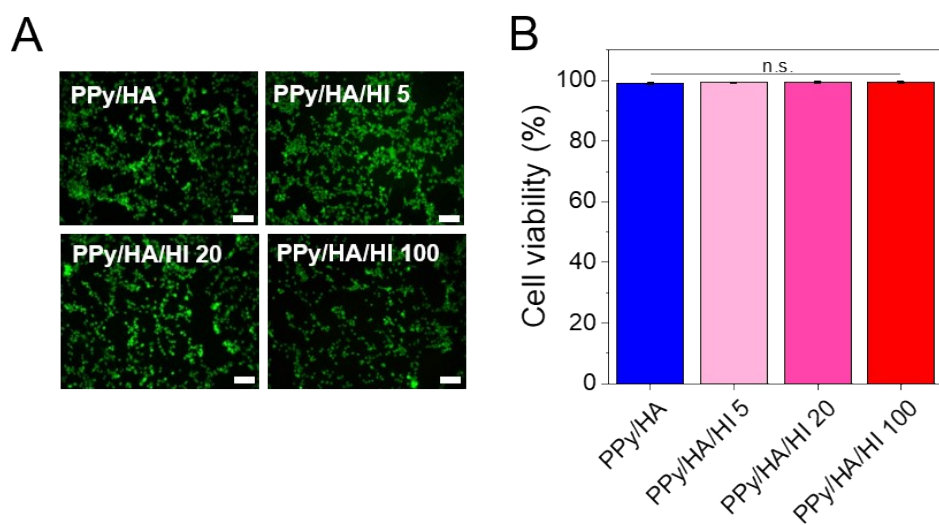

**Figure S5.** Cytocompatibility of various PPy/HA/HI electrodes prepared with different concentrations of glycyrrhizin. (A) LIVE/DEAD fluorescence images of NIH-3T3 cells incubated with the extracts obtained from various PPy/HA/HI electrodes. (B) Corresponding cell viability for each sample.

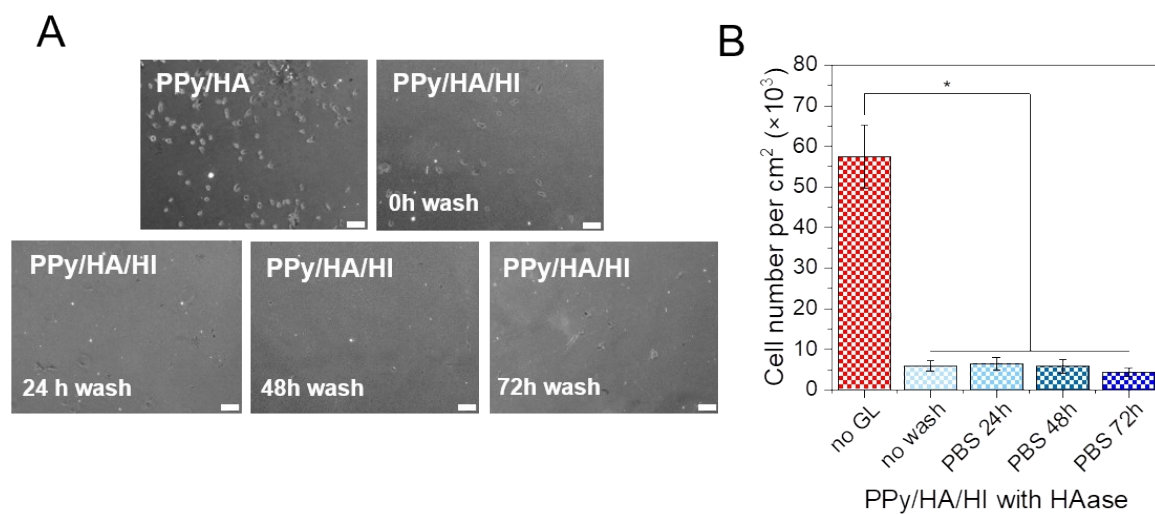

**Figure S6.** PPy/HA/Hi electrodes' long-term resistance to cell adhesion. PPy/HA/Hi electrodes were pre-incubated for washing for 0, 24, 48, or 72 h, respectively. (A) Optical images of NIH-3T3 cells on the PPy/HA/Hi electrodes, pre-incubated with phosphate buffered saline (PBS) for different time periods. Scale bar = 100  $\mu\text{m}$ . (B) Cell number per image of each electrode, 24 h after cell culture.

**Table S1.** Cumulative release amount of glycyrrhizin from various PPy/HA/HI electrodes (prepared with different concentrations of glycyrrhizin) in PBS solution with time.

|                                               | <b>PPy/HA/HI 5</b>   | <b>PPy/HA/HI 20</b>   | <b>PPy/HA/HI 100</b>   |
|-----------------------------------------------|----------------------|-----------------------|------------------------|
| <b>30min</b>                                  | 0.783 ( $\pm 0.63$ ) | 11.662 ( $\pm 3.52$ ) | 88.801 ( $\pm 7.38$ )  |
| <b>2h</b>                                     | 1.55 ( $\pm 1.24$ )  | 17.44 ( $\pm 4.68$ )  | 133.36 ( $\pm 18.85$ ) |
| <b>6h</b>                                     | 1.91 ( $\pm 1.42$ )  | 19.36 ( $\pm 4.67$ )  | 151.24 ( $\pm 28.65$ ) |
| <b>24h</b>                                    | 4.46 ( $\pm 2.237$ ) | 33.31 ( $\pm 7.73$ )  | 158.34 ( $\pm 32.58$ ) |
| <b>48h</b>                                    | 4.46 ( $\pm 2.237$ ) | 33.31 ( $\pm 7.73$ )  | 158.56 ( $\pm 32.59$ ) |
| <b>72h</b>                                    | 4.46 ( $\pm 2.237$ ) | 33.31 ( $\pm 7.733$ ) | 158.74 ( $\pm 32.58$ ) |
| <b>Tot. amount (<math>\mu\text{M}</math>)</b> | 4.46                 | 33.31                 | <b>158.74</b>          |
